# Supplementary material
Source: Oxford University Press journal article supplement (https://arvo.silverchair-cdn.com/arvo/content_public/journal/iovs/932950/supplementary_figures5_for_on_iovs.pdf)
Supplement: Supplementary file 1 [file supplementary_figures5_for_on_iovs.pdf]

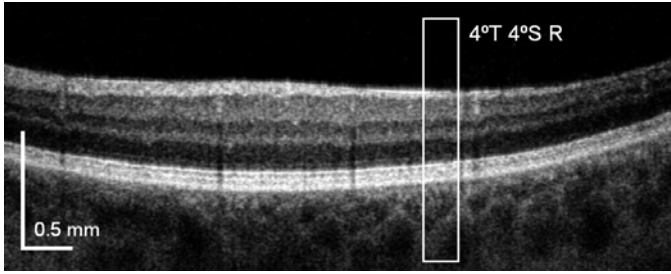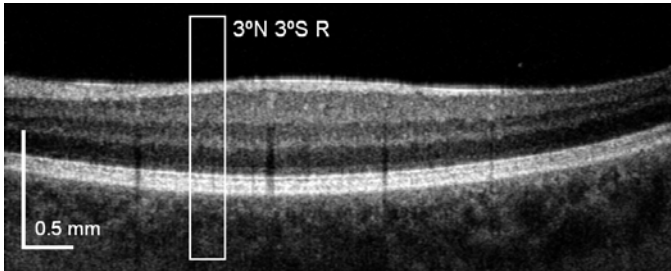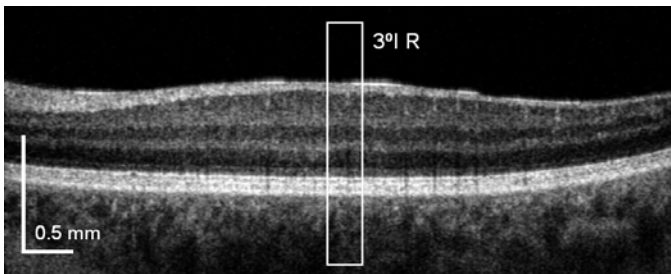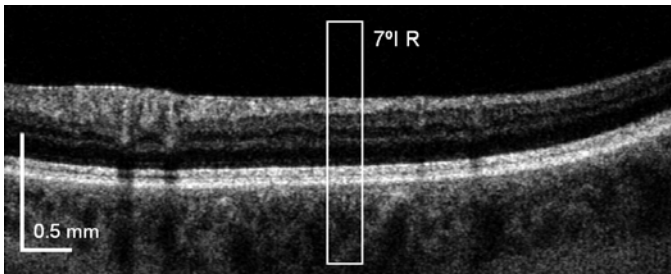

**Supplementary Figure S5.** FD-OCT images at the corresponding vertical locations in the retina in the left eye of the MS1 patient. Each box represents the location where the AO-flood *en face* images were acquired. Scale bar = 0.5 mm. T: temporal, N: nasal, S: superior, I: inferior, R: retina.
